# Supplementary material for: Iron and sulfide nanoparticle formation and transport in nascent hydrothermal vent plumes
Source: PubMed Central journal article supplement (PMC6453976; doi:10.1038/s41467-019-09580-5), 2019-04-08
Supplement: 41467_2019_9580_MOESM1_ESM.pdf [file 41467_2019_9580_MOESM1_ESM.pdf]

# **Iron and sulfide nanoparticle formation and transport in nascent hydrothermal vent plumes**

Findlay et al., 2019

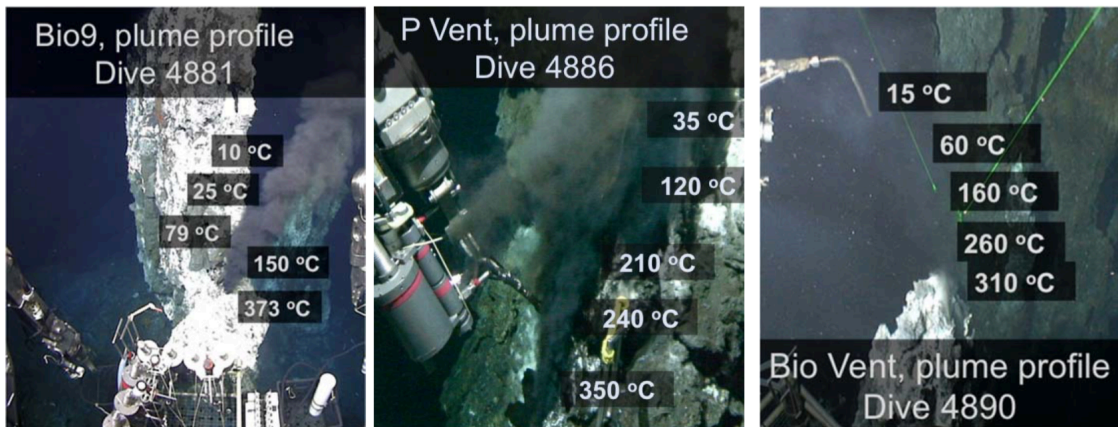

**Supplementary Figure 1:** Temperature profiles in the buoyant plume. All samples were taken within the first meter above the vent orifice.

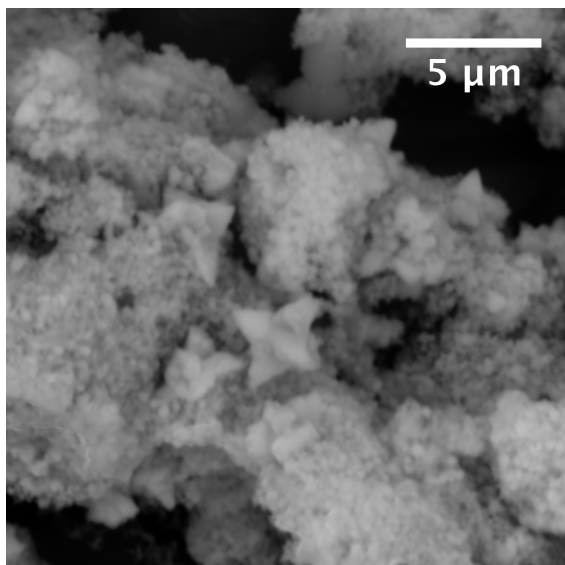

**Supplementary Figure 2:** Representative SEM Micrograph of mixed metal sulphide particles and nanoparticles from the end-member fluid of Bio 9. The larger, star-shaped particles have an S to Fe ratio of 2. The surrounding nanoparticles are mixed Fe, Zn and Cu sulphides. Element ratios were determined using EDS.

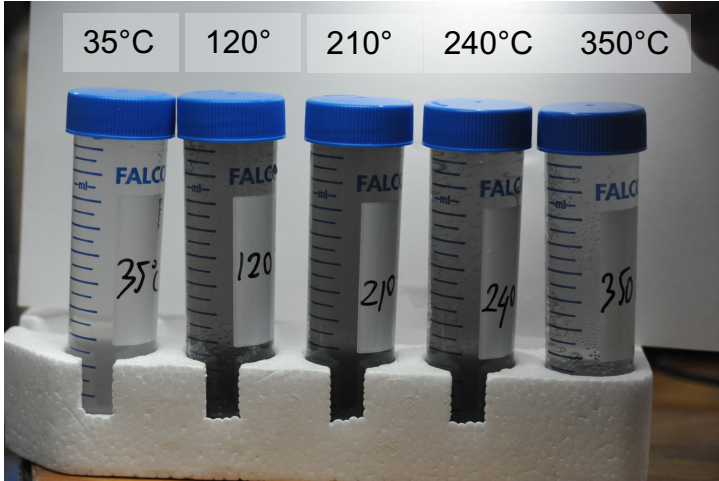

**Supplementary Figure 3:** Photo of plume samples from the plume at P Vent, showing the visual difference in particle density over the temperature gradient.

| Vent     | Distance from orifice (cm) | [Mg] ( $\mu\text{M}$ ) | T ( $^{\circ}\text{C}$ ) | pH   | filtered (0.2 $\mu\text{m}$ )         |         |                                          |         | unfiltered                            |         |                                          |         | % Fe < 0.2 $\mu\text{m}$ | filtered (0.2 $\mu\text{m}$ ) |                       | unfiltered            |                       | total sulphide ( $\mu\text{M}$ ) | CRS as % total sulphide | filtered CRS/Fe <sub>py</sub> | S:Fe |
|----------|----------------------------|------------------------|--------------------------|------|---------------------------------------|---------|------------------------------------------|---------|---------------------------------------|---------|------------------------------------------|---------|--------------------------|-------------------------------|-----------------------|-----------------------|-----------------------|----------------------------------|-------------------------|-------------------------------|------|
|          |                            |                        |                          |      | [Fe <sup>2+</sup> ] ( $\mu\text{M}$ ) | std dev | [Fe <sub>Total</sub> ] ( $\mu\text{M}$ ) | std dev | [Fe <sup>2+</sup> ] ( $\mu\text{M}$ ) | std dev | [Fe <sub>Total</sub> ] ( $\mu\text{M}$ ) | std dev |                          | AVS ( $\mu\text{M}$ )         | CRS ( $\mu\text{M}$ ) | AVS ( $\mu\text{M}$ ) | CRS ( $\mu\text{M}$ ) |                                  |                         |                               |      |
| Bio9     | 0                          | 3.40                   | 373                      | 3.13 | 1357                                  | 17      | 1330                                     | 3       | 1328                                  | 8       | 1346                                     | 15      | 102                      | 4887                          | 246                   | 5966                  | 819                   | 6784                             | 3.6                     | --                            | 5    |
|          | 2                          | 43.7                   | 150                      | 4.87 | 213                                   | 7       | 248                                      | 9       | 279                                   | 17      | 280                                      | 48      | 76                       | 746                           | 216                   | 1120                  | 454                   | 1574                             | 13.7                    | 5.0                           | 6    |
|          | 5                          | 52.2                   | 79                       | 5.31 | 116                                   | 7       | 124                                      | 6       | 132                                   | 6       | 155                                      | 4       | 88                       | 408                           | 58                    | 306                   | 196                   | 501                              | 11.6                    | 2.5                           | 3    |
|          | 10                         | 51.4                   | 25                       | 5.58 | 75                                    | 2       | 86                                       | 3       | 91                                    | 1       | 115                                      | 4       | 82                       | 165                           | 22                    | 335                   | 112                   | 447                              | 5.0                     | 2.5                           | 4    |
|          | 20                         | 51.1                   | 10                       | 6.28 | 19                                    | 1       | 22                                       | 1       | 22                                    | 1       | 27                                       | 4       | 84                       | 0                             | 0                     | 2                     | 2                     | 4                                | 0.0                     | 0.0                           | 0.1  |
| P Vent   | 0                          | 5.3                    | 350                      | 3.27 | 1034                                  | 14      | 1048                                     | 40      | 1048                                  | 13      | 1065                                     | 9       | 99                       | 4735                          | 204                   | 4595                  | 1065                  | 5659                             | 3.6                     | --                            | 5    |
|          | 5                          | 25.9                   | 240                      | 3.93 | 498                                   | 6       | 518                                      | 5       | 592                                   | 7       | 615                                      | 17      | 84                       | 3142                          | 256                   | 2682                  | 1438                  | 4121                             | 6.2                     | 13.0                          | 7    |
|          | 10                         | 28.3                   | 210                      | 4.01 | 321                                   | 4       | 339                                      | 7       | 425                                   | 10      | 430                                      | 6       | 76                       | 2794                          | 441                   | 2464                  | 1154                  | 3619                             | 12.2                    | 24.6                          | 8    |
|          | 20                         | 46.0                   | 120                      | 4.87 | 230                                   | 14      | 235                                      | 3       | 294                                   | 4       | 301                                      | 8       | 78                       | 1569                          | 72                    | 1624                  | 487                   | 2111                             | 3.4                     | 5.5                           | 7    |
|          | 100                        | 51.5                   | 35                       | 5.73 | 52                                    | 2       | 67                                       | 7       | 62                                    | 2       | 73                                       | 3       | 83                       | 94                            | 29                    | 178                   | 94                    | 272                              | 10.8                    | 1.9                           | 4    |
| Bio Vent | 0                          | 11.5                   | 310                      | 3.77 | 301                                   | 2       | 283                                      | 4       | 310                                   | 6       | 315                                      | 9       | 97                       | 4523                          | 63                    | 5333                  | 198                   | 5531                             | 1.1                     | --                            | 18   |
|          | 2                          | 20.4                   | 260                      | 4.10 | 186                                   | 4       | 181                                      | 13      | 216                                   | 5       | 308                                      | 19      | 86                       | 3521                          | 134                   | 3957                  | 293                   | 4250                             | 3.1                     | --                            | 14   |
|          | 5                          | 32.4                   | 160                      | 4.34 | 151                                   | 18      | 124                                      | 10      | 161                                   | 6       | 173                                      | 17      | 94                       | 2735                          | 89                    | 3368                  | 319                   | 3688                             | 2.4                     | --                            | 21   |
|          | 50                         | 47.1                   | 60                       | 4.77 | 87                                    | 1       | 94                                       | 6       | 88                                    | 9       | 99                                       | 3       | 98                       | 1506                          | 62                    | 1755                  | 138                   | 1892                             | 3.3                     | --                            | 19   |
|          | 100                        | 54.0                   | 10                       | 5.79 | 15                                    | 1       | 24                                       | 3       | 15                                    | 0       | 31                                       | 1       | 98                       | 123                           | 18                    | 142                   | 30                    | 172                              | 10.4                    | 2.0                           | 6    |

**Supplementary Table 1:** Total and filtered Fe and sulphide (AVS and CRS) concentrations for each sample. CRS/Fe<sub>py</sub> represents the ratio between filtered CRS and nanoparticulate Fe as determined from Fe analyses (for more details, please refer to the main text). If all CRS < 0.2  $\mu\text{m}$  is pyrite, the ratio should equal 2.

| Location | Temperature (°C) | Minerals                                                         |
|----------|------------------|------------------------------------------------------------------|
| Bio 9    | 373              | Pyrite, Chalcopyrite, Sphalerite, nano ZnS                       |
|          | 150              | $\alpha$ -Sulfur, Barite                                         |
|          | 79               | $\alpha$ -Sulfur, Sphalerite                                     |
|          | 25               | $\alpha$ -Sulfur                                                 |
|          | 10               | N/A                                                              |
| P-vent   | 350              | Pyrite, Anhydrite, Chalcopyrite/Isocubanite, Gordaite, nano ZnS  |
|          | 240              | $\alpha$ -Sulfur, Sphalerite, Pyrite                             |
|          | 210              | $\alpha$ -Sulfur                                                 |
|          | 120              | $\alpha$ -Sulfur                                                 |
|          | 35               | N/A                                                              |
| Biovent  | 310              | $\alpha$ -Sulfur, Chalcopyrite/Isocubanite, Sphalerite, nano ZnS |
|          | 260              | $\alpha$ -Sulfur, Sphalerite, Gordaite, nano ZnS                 |
|          | 160              | $\alpha$ -Sulfur, Gordaite, Sphalerite, Barite, nano ZnS         |
|          | 60               | Gordaite, $\alpha$ -Sulfur                                       |
|          | 10               | N/A                                                              |

**Supplementary Table 2:** Bulk mineralogy in samples from the end-member and within the first meter of buoyant plume of each vent.
